# Supplementary material
Source: PubMed Central journal article supplement (PMC4974895)
Supplement: CJN.13441215SupplementaryData.pdf [file CJN.13441215SupplementaryData.pdf]

**Supplemental Material**

**Supplemental Table 1.** Comprehensive description of the CMS and KCQA UF rate measures.<sup>6</sup>

|                             | <b>CMS Measure</b>                                                                                                                                                                                                                                                                                                                                                                                                             | <b>KCQA Measure</b>                                                                                                                                                                                                                                                                                                                                                                                                                                                                                                                                                                                                                                                                                                                                                                                                                                                                                                                                                                                                                                                                                                                                                          |
|-----------------------------|--------------------------------------------------------------------------------------------------------------------------------------------------------------------------------------------------------------------------------------------------------------------------------------------------------------------------------------------------------------------------------------------------------------------------------|------------------------------------------------------------------------------------------------------------------------------------------------------------------------------------------------------------------------------------------------------------------------------------------------------------------------------------------------------------------------------------------------------------------------------------------------------------------------------------------------------------------------------------------------------------------------------------------------------------------------------------------------------------------------------------------------------------------------------------------------------------------------------------------------------------------------------------------------------------------------------------------------------------------------------------------------------------------------------------------------------------------------------------------------------------------------------------------------------------------------------------------------------------------------------|
| <b>Description</b>          | % of patients in the facility with an UF rate >13 mL/h/kg                                                                                                                                                                                                                                                                                                                                                                      | % of patients in the facility with an average UF rate ≥13 mL/h/kg and an average treatment time <240 minutes                                                                                                                                                                                                                                                                                                                                                                                                                                                                                                                                                                                                                                                                                                                                                                                                                                                                                                                                                                                                                                                                 |
| <b>Time window</b>          | 1 month                                                                                                                                                                                                                                                                                                                                                                                                                        | 12 months                                                                                                                                                                                                                                                                                                                                                                                                                                                                                                                                                                                                                                                                                                                                                                                                                                                                                                                                                                                                                                                                                                                                                                    |
| <b>Numerator</b>            | Number of patient-months in the facility with an UF rate >13 mL/h/kg                                                                                                                                                                                                                                                                                                                                                           | Number of patient-months in the facility with an average UF rate ≥13 mL/h/kg and an average treatment time <240 minutes                                                                                                                                                                                                                                                                                                                                                                                                                                                                                                                                                                                                                                                                                                                                                                                                                                                                                                                                                                                                                                                      |
| <b>Numerator details</b>    | <p>For the HD treatment that meets the inclusion criteria:</p> <ol style="list-style-type: none"> <li>Calculate the UF rate (mL/h/kg):</li> </ol> $\text{UF rate} = (\text{pre-dialysis weight} - \text{post-dialysis weight (mL)}) / \text{delivered TT (h)} / \text{post-dialysis weight (kg)}$ <ol style="list-style-type: none"> <li>Sum the number of patients in each facility with an UF rate &gt;13 mL/h/kg</li> </ol> | <p>For all HD treatments that meet the inclusion criteria:</p> <ol style="list-style-type: none"> <li>Calculate the UF rate (mL/h/kg) for each HD treatment:</li> </ol> $\text{UF rate}_{\text{Treat}} = (\text{pre-dialysis weight} - \text{post-dialysis weight (mL)}) / \text{delivered TT (h)} / \text{post-dialysis weight (kg)}$ <ol style="list-style-type: none"> <li>Calculate each patient's average UF rate for all HD treatments during the week that the monthly Kt/V is drawn:</li> </ol> $\text{UF rate}_{\text{Mean}} = (\text{UF rate}_1 + \dots \text{UF rate}_j) / j$ <p>j=Number of treatments during the week that the monthly Kt/V is drawn</p> <ol style="list-style-type: none"> <li>Calculate each patient's average treatment time for all HD treatments during the week that the monthly Kt/V is drawn:</li> </ol> $\text{TT}_{\text{Mean}} = (\text{TT}_1 + \dots \text{TT}_j) / j$ <p>j=Number of treatments during the week that the monthly Kt/V is drawn</p> <ol style="list-style-type: none"> <li>Sum the number of patients in each facility with an average UF rate ≥13 mL/h/kg and an average treatment time &lt;240 minutes</li> </ol> |
| <b>Denominator</b>          | Total number of adult, in-center HD patients at the reporting facility meeting selection criteria                                                                                                                                                                                                                                                                                                                              | Total number of adult, in-center HD patients at the reporting facility meeting selection criteria                                                                                                                                                                                                                                                                                                                                                                                                                                                                                                                                                                                                                                                                                                                                                                                                                                                                                                                                                                                                                                                                            |
| <b>Denominator details</b>  | Identify all patients ≥18 years in the dialysis facility during the reporting period whose primary treatment modality is in-center HD                                                                                                                                                                                                                                                                                          | Identify all patients ≥18 years in the dialysis facility during the reporting period whose primary treatment modality is in-center HD                                                                                                                                                                                                                                                                                                                                                                                                                                                                                                                                                                                                                                                                                                                                                                                                                                                                                                                                                                                                                                        |
| <b>Exclusions</b>           | <ol style="list-style-type: none"> <li>PD or home HD patients</li> <li>Age &lt;18 years</li> <li>Treatment without complete pre-weight, post-weight, and TT</li> <li>Patient present at reporting facility &lt;30 days</li> <li>Patient at facility with &lt;11 patients during month</li> <li>Patient with dialysis vintage &lt;90 days</li> <li>No treatment with UF rate 0-50 mL/h/kg</li> </ol>                            | <ol style="list-style-type: none"> <li>PD or home HD patients</li> <li>Age &lt;18 years</li> <li>Treatment without complete pre-weight, post-weight, and TT</li> <li>Patient present at reporting facility &lt;30 days</li> <li>Patient at facility with &lt;11 patients during month</li> <li>&lt;7 HD treatments during reporting month</li> <li>≥4 HD treatments during the calculation period<sup>a</sup></li> </ol>                                                                                                                                                                                                                                                                                                                                                                                                                                                                                                                                                                                                                                                                                                                                                     |
| <b>Score type</b>           | Rate / proportion                                                                                                                                                                                                                                                                                                                                                                                                              | Rate / proportion                                                                                                                                                                                                                                                                                                                                                                                                                                                                                                                                                                                                                                                                                                                                                                                                                                                                                                                                                                                                                                                                                                                                                            |
| <b>Score interpretation</b> | Lower score more favorable                                                                                                                                                                                                                                                                                                                                                                                                     | Lower score more favorable                                                                                                                                                                                                                                                                                                                                                                                                                                                                                                                                                                                                                                                                                                                                                                                                                                                                                                                                                                                                                                                                                                                                                   |
| <b>Algorithm</b>            | Scores are calculated on a monthly basis using the following algorithm:                                                                                                                                                                                                                                                                                                                                                        | Scores are calculated on a monthly basis and then averaged over a 12-month period using the following algorithm:                                                                                                                                                                                                                                                                                                                                                                                                                                                                                                                                                                                                                                                                                                                                                                                                                                                                                                                                                                                                                                                             |

|  |                                                                                                                                                                                                                                                                              |                                                                                                                                                                                                                                                                                                                                                                                                                                                                                                                                    |
|--|------------------------------------------------------------------------------------------------------------------------------------------------------------------------------------------------------------------------------------------------------------------------------|------------------------------------------------------------------------------------------------------------------------------------------------------------------------------------------------------------------------------------------------------------------------------------------------------------------------------------------------------------------------------------------------------------------------------------------------------------------------------------------------------------------------------------|
|  | <p>1. Sum the number of patients in the denominator for each facility month</p> <p>2. Sum the number of patients in the numerator for each facility month</p> <p>3. Calculate the facility's monthly score:</p> <p>Score = Numerator Population / Denominator Population</p> | <p>1. Sum the number of patients in the denominator for each facility month</p> <p>2. Sum the number of patients in the numerator for each facility month</p> <p>3. Calculate the facility's score for each month:</p> <p>Score<sub>k</sub> = Numerator Population<sub>k</sub> / Denominator Population<sub>k</sub><br/> k=Each month of the reporting year</p> <p>4. Calculate the facility's annual score:<br/> Annual Score = (Score<sub>1</sub> + ... Score<sub>k</sub>) / k<br/> k=Number of months in the reporting year</p> |
|--|------------------------------------------------------------------------------------------------------------------------------------------------------------------------------------------------------------------------------------------------------------------------------|------------------------------------------------------------------------------------------------------------------------------------------------------------------------------------------------------------------------------------------------------------------------------------------------------------------------------------------------------------------------------------------------------------------------------------------------------------------------------------------------------------------------------------|

<sup>a</sup> The National Quality Forum reported an exclusion of >4 HD treatments during the calculation period in their documentation of the KCQA measure;<sup>6</sup> however, the KCQA measure developers tested an exclusion of ≥4 HD treatments during the calculation period.<sup>22</sup> As an exclusion of ≥4 HD treatments represented developer intent and is congruent with the standard practice of 3 weekly treatments, we evaluated the measure using an exclusion of ≥4 HD treatments.

Abbreviations: CMS=Centers for Medicare & Medicaid Services, KCQA=Kidney Care Quality Alliance, UF=ultrafiltration, UFR=ultrafiltration rate, TT=treatment time, HD=hemodialysis.

**Supplemental Table 2.** Detailed description of additional facility treatment time calculation with the application of a 13 mL/h/kg UF rate threshold.

| Actual Data |                          |                                                 |                                      |                        |                                    | Calculated Data for<br>13 mL/h/kg UF rate threshold |                               |                                      |                                               |
|-------------|--------------------------|-------------------------------------------------|--------------------------------------|------------------------|------------------------------------|-----------------------------------------------------|-------------------------------|--------------------------------------|-----------------------------------------------|
| HD<br>tmt   | Pre-HD<br>weight<br>(kg) | Previous<br>treatment<br>post-HD<br>weight (kg) | Interdialytic<br>weight gain<br>(kg) | Prescribed<br>TT (min) | Prescribed<br>UF rate<br>(mL/h/kg) | Additional TT<br>required<br>(min)                  | New<br>prescribed<br>TT (min) | Cumulative<br>additional TT<br>(min) | UF rate<br>(mL/h/kg)<br>after TT<br>extension |
| 1           | 91.8                     | 87.7                                            | 4.1                                  | 180                    | 15.4                               | 37                                                  | 217                           | 37                                   | 12.9                                          |
| 2           | 93.3                     | 88.8                                            | 4.5                                  | 180                    | 16.4                               | 56                                                  | 236                           | 93                                   | 12.9                                          |
| 3           | 95.0                     | 91.0                                            | 4.0                                  | 180                    | 14.5                               | 24                                                  | 204                           | 117                                  | 12.9                                          |
| 4           | 95.2                     | 92.0                                            | 3.2                                  | 180                    | 11.7                               | 0                                                   | 180                           | 117                                  | ---                                           |
| 5           | 96.3                     | 91.0                                            | 5.3                                  | 180                    | 19.3                               | 60                                                  | 240                           | 177                                  | 14.6                                          |
| 6           | 92.5                     | 89.0                                            | 3.5                                  | 180                    | 13.0                               | 3                                                   | 180                           | 180                                  | ---                                           |
| 7           | 92.0                     | 89.9                                            | 2.1                                  | 180                    | 7.8                                | 0                                                   | 180                           | 180                                  | ---                                           |
| 8           | 93.9                     | 90.1                                            | 3.8                                  | 180                    | 14.1                               | 16                                                  | 196                           | 196                                  | 12.9                                          |
| 9           | 92.2                     | 88.9                                            | 3.3                                  | 180                    | 12.2                               | 0                                                   | 180                           | 196                                  | ---                                           |
| 10          | 91.7                     | 89.9                                            | 1.8                                  | 180                    | 6.7                                | 0                                                   | 180                           | 196                                  | ---                                           |
| 11          | 91.5                     | 89.2                                            | 2.3                                  | 180                    | 8.7                                | 0                                                   | 180                           | 196                                  | ---                                           |
| 12          | 92.5                     | 87.7                                            | 4.8                                  | 180                    | 18.0                               | 60                                                  | 240                           | 256                                  | 13.7                                          |
| 13          | 94.3                     | 88.9                                            | 5.4                                  | 180                    | 19.8                               | 60                                                  | 240                           | 316                                  | 15.2                                          |

In order to calculate the weekly additional TT needed to meet a 13 mL/h/ UF rate threshold, treatments were restricted to those occurring in January 2012. All treatments from the week of the monthly Kt/V were isolated and the prescribed UF rate for each treatment was calculated as follows: (pre-dialysis weight from current treatment – post-dialysis weight from previous treatment (mL))/ prescribed TT (h)/ post-dialysis weight from previous treatment (kg). For treatments with a prescribed UF rate <13 mL/h/kg, no additional TT was assigned. For treatments with a prescribed UF rate ≥13 mL/h/kg, the additional TT (in minutes) needed to achieve the UF rate threshold was calculated as follows: ((pre-dialysis weight from current treatment – post-dialysis weight from previous treatment (mL))/ (post-dialysis weight from previous treatment (kg)\*12.9))\*60 – prescribed TT (min). Additional TTs were then summed for each patient and subsequently for each facility. An example of this calculation applied to an individual patient for all January 2012 treatments is shown in the table.

Abbreviations: HD=hemodialysis, tmt=treatment, TT=treatment time, UF=ultrafiltration.

**Supplemental Table 3.** Individual and facility-level UF rate measures calculated with varied operational definitions.<sup>a</sup>

| Month     | Delivered UF rate from monthly Kt/V day |                                                                      | Delivered UF rate from last treatment of the month |                                                                      |                             | Mean delivered UF rate from week of Kt/V |                                                                      |
|-----------|-----------------------------------------|----------------------------------------------------------------------|----------------------------------------------------|----------------------------------------------------------------------|-----------------------------|------------------------------------------|----------------------------------------------------------------------|
|           | Patient-level                           | Facility-level                                                       | Patient-level                                      | Facility-level                                                       | Last dialysis days of month | Patient-level                            | Facility-level                                                       |
|           | UF rate (mL/h/kg) (mean ± SD)           | Percentage of facility patients with UF rate >13 mL/h/kg (mean ± SD) | UF rate (mL/h/kg) (mean ± SD)                      | Percentage of facility patients with UF rate >13 mL/h/kg (mean ± SD) |                             | UF rate (mL/h/kg) (mean ± SD)            | Percentage of facility patients with UF rate >13 mL/h/kg (mean ± SD) |
| January   | 9.8 ± 5.5                               | 22.3 ± 10.8                                                          | 10.3 ± 5.6                                         | 25.8 ± 10.9                                                          | Mon/Tues                    | 9.7 ± 4.6                                | 19.9 ± 10.2                                                          |
| February  | 9.9 ± 5.5                               | 22.8 ± 10.6                                                          | 9.7 ± 5.5                                          | 21.7 ± 9.9                                                           | Tues/Wed                    | 9.7 ± 4.6                                | 19.8 ± 9.8                                                           |
| March     | 9.7 ± 5.4                               | 22.1 ± 10.7                                                          | 9.0 ± 5.2                                          | 17.9 ± 9.2                                                           | Fri/Sat                     | 9.6 ± 4.5                                | 18.9 ± 9.7                                                           |
| April     | 9.7 ± 5.3                               | 22.0 ± 10.7                                                          | 9.7 ± 5.3                                          | 22.8 ± 10.4                                                          | Fri/Sat                     | 9.5 ± 4.5                                | 18.6 ± 9.9                                                           |
| May       | 9.7 ± 5.3                               | 21.6 ± 10.6                                                          | 9.0 ± 5.2                                          | 17.8 ± 8.8                                                           | Wed/Thurs                   | 9.5 ± 4.4                                | 18.1 ± 9.5                                                           |
| June      | 9.6 ± 5.3                               | 21.4 ± 10.6                                                          | 8.7 ± 5.2                                          | 16.1 ± 8.2                                                           | Fri/Sat                     | 9.4 ± 4.4                                | 17.8 ± 9.4                                                           |
| July      | 9.5 ± 5.3                               | 20.8 ± 10.3                                                          | 10.0 ± 5.4                                         | 24.3 ± 10.4                                                          | Mon/Tues                    | 9.3 ± 4.5                                | 17.1 ± 9.0                                                           |
| August    | 9.5 ± 5.3                               | 21.0 ± 10.1                                                          | 8.8 ± 5.2                                          | 17.2 ± 8.6                                                           | Thurs/Fri                   | 9.3 ± 4.4                                | 17.5 ± 9.2                                                           |
| September | 9.5 ± 5.2                               | 21.1 ± 10.0                                                          | 8.9 ± 5.1                                          | 17.3 ± 8.6                                                           | Fri/Sat                     | 9.4 ± 4.4                                | 17.8 ± 9.2                                                           |
| October   | 9.7 ± 5.3                               | 22.1 ± 10.6                                                          | 9.6 ± 5.4                                          | 20.9 ± 9.5                                                           | Tues/Wed                    | 9.5 ± 4.4                                | 18.2 ± 9.5                                                           |
| November  | 9.8 ± 5.3                               | 22.3 ± 10.9                                                          | 9.1 ± 5.2                                          | 18.2 ± 9.1                                                           | Thurs/Fri                   | 9.6 ± 4.5                                | 18.5 ± 9.7                                                           |
| December  | 9.7 ± 5.2                               | 21.9 ± 10.6                                                          | 9.4 ± 5.3                                          | 21.1 ± 9.9                                                           | Sat/Mon                     | 9.4 ± 4.4                                | 17.9 ± 9.5                                                           |

| Month     | Mean delivered UF rate for month (≥7 treatments required) |                                                                      | Mean delivered UF rate from week of Kt/V (≥2 treatments required) |                                                                      | Prescribed UF rate from monthly Kt/V day |                                                                      |
|-----------|-----------------------------------------------------------|----------------------------------------------------------------------|-------------------------------------------------------------------|----------------------------------------------------------------------|------------------------------------------|----------------------------------------------------------------------|
|           | Patient-level                                             | Facility-level                                                       | Patient-level                                                     | Facility-level                                                       | Patient-level                            | Facility-level                                                       |
|           | UF rate (mL/h/kg) (mean ± SD)                             | Percentage of facility patients with UF rate >13 mL/h/kg (mean ± SD) | UF rate (mL/h/kg) (mean ± SD)                                     | Percentage of facility patients with UF rate >13 mL/h/kg (mean ± SD) | UF rate (mL/h/kg) (mean ± SD)            | Percentage of facility patients with UF rate >13 mL/h/kg (mean ± SD) |
| January   | 9.8 ± 4.0                                                 | 18.5 ± 10.6                                                          | 9.7 ± 4.5                                                         | 19.8 ± 10.3                                                          | 10.0 ± 5.9                               | 23.4 ± 13.5                                                          |
| February  | 9.7 ± 3.9                                                 | 17.6 ± 10.2                                                          | 9.7 ± 4.5                                                         | 19.7 ± 10.0                                                          | 10.2 ± 5.9                               | 25.1 ± 13.9                                                          |
| March     | 9.5 ± 3.9                                                 | 16.7 ± 10.0                                                          | 9.6 ± 4.4                                                         | 18.9 ± 9.9                                                           | 10.1 ± 5.9                               | 24.4 ± 13.7                                                          |
| April     | 9.6 ± 3.9                                                 | 17.0 ± 10.1                                                          | 9.6 ± 4.4                                                         | 18.4 ± 9.9                                                           | 10.1 ± 5.8                               | 24.6 ± 14.1                                                          |
| May       | 9.5 ± 3.9                                                 | 16.0 ± 9.6                                                           | 9.5 ± 4.3                                                         | 18.0 ± 9.6                                                           | 10.0 ± 5.8                               | 24.0 ± 13.8                                                          |
| June      | 9.3 ± 3.8                                                 | 15.5 ± 9.4                                                           | 9.4 ± 4.3                                                         | 17.7 ± 9.5                                                           | 10.1 ± 5.9                               | 24.3 ± 13.7                                                          |
| July      | 9.4 ± 3.9                                                 | 15.7 ± 9.3                                                           | 9.3 ± 4.3                                                         | 16.9 ± 9.2                                                           | 9.9 ± 5.8                                | 24.0 ± 12.9                                                          |
| August    | 9.4 ± 3.8                                                 | 15.3 ± 9.2                                                           | 9.3 ± 4.3                                                         | 17.4 ± 9.4                                                           | 9.9 ± 5.8                                | 23.9 ± 13.5                                                          |
| September | 9.4 ± 3.8                                                 | 15.9 ± 9.3                                                           | 9.4 ± 4.3                                                         | 17.8 ± 9.4                                                           | 9.9 ± 5.8                                | 23.1 ± 13.1                                                          |
| October   | 9.6 ± 3.9                                                 | 16.7 ± 9.8                                                           | 9.5 ± 4.3                                                         | 18.1 ± 9.6                                                           | 10.2 ± 5.9                               | 25.3 ± 14.0                                                          |
| November  | 9.6 ± 3.8                                                 | 16.3 ± 9.9                                                           | 9.6 ± 4.4                                                         | 18.5 ± 9.9                                                           | 10.3 ± 5.9                               | 26.2 ± 14.0                                                          |
| December  | 9.5 ± 3.8                                                 | 16.2 ± 9.6                                                           | 9.5 ± 4.3                                                         | 18.0 ± 9.6                                                           | 10.3 ± 5.9                               | 25.2 ± 13.8                                                          |

<sup>a</sup> Estimation of monthly mean UF rates and mean percentage of facility patients with a UF rate > 13 mL/h/kg is presented for the 2012 CMS cohort (148,950 unique patients treated in 1,902 dialysis facilities) for 6 alternative operational definitions.

Abbreviations: UF=ultrafiltration, CMS=Centers for Medicare & Medicaid Services, SD=standard deviation.

**Supplemental Table 4.** Patient subgroups according to varied UF rate thresholds as of the first 2012 reporting month.

|                                                                      | CMS Measure      |                                                              |                                                              |                           | KCQA Measure     |                                                              |                                                              |                           |
|----------------------------------------------------------------------|------------------|--------------------------------------------------------------|--------------------------------------------------------------|---------------------------|------------------|--------------------------------------------------------------|--------------------------------------------------------------|---------------------------|
|                                                                      | Total # patients | Percentage of patients with UF rate >10 mL/h/kg (# patients) | Percentage of patients with UF rate >13 mL/h/kg (# patients) | % Difference (# patients) | Total # patients | Percentage of patients with UF rate ≥10 mL/h/kg (# patients) | Percentage of patients with UF rate ≥13 mL/h/kg (# patients) | % Difference (# patients) |
| Full cohort                                                          | 148,950          | 40.6% (60,502)                                               | 21.3% (31,719)                                               | 19.3% (28,783)            | 151,937          | 37.4% (56,758)                                               | 18.0% (27,298)                                               | 19.4% (29,460)            |
| History of heart failure                                             | 38,506           | 45.4% (17,487)                                               | 24.8% (9,535)                                                | 20.6% (7,952)             | 37,609           | 44.4% (16,686)                                               | 22.6% (8,482)                                                | 21.8% (8,204)             |
| Pre-HD systolic BP <100 mmHg <sup>a</sup>                            | 3,087            | 36.5% (1,126)                                                | 19.4% (600)                                                  | 17.1% (526)               | 3,310            | 32.8% (1,087)                                                | 16.0% (531)                                                  | 16.8% (556)               |
| History of IDH <sup>b</sup>                                          | 30,045           | 40.5% (12,168)                                               | 20.7% (6,218)                                                | 19.8% (5,950)             | 30,251           | 37.1% (11,221)                                               | 17.4% (5,259)                                                | 19.7% (5,962)             |
| History of IDH among patients with pre-HD SBP ≥100 mmHg <sup>c</sup> | 27,088           | 40.9% (11,075)                                               | 20.9% (5,649)                                                | 20.0% (5,426)             | 27,033           | 37.7% (10,196)                                               | 17.6% (4,771)                                                | 20.1% (5,425)             |

<sup>a</sup> Pre-HD SBP <100 mmHg in >30% of treatments in the prior month.

<sup>b</sup> Nadir SBP <90 mmHg in >30% of treatments in the prior month.

<sup>c</sup> Nadir SBP <90 mmHg and pre-HD SBP ≥100 mmHg in >30% of treatments in the prior month.

Abbreviations: CMS=Centers for Medicare & Medicaid Services, KCQA=Kidney Care Quality Alliance, UF=ultrafiltration, HD=hemodialysis, BP=blood pressure, IDH=intradialytic hypotension.

**Supplemental Table 5.** Facility characteristics of western region units compared to other regions.<sup>a</sup>

|                                                 | Western Region | Non-Western Region |
|-------------------------------------------------|----------------|--------------------|
| N (%)                                           | 359 (20.5)     | 1,391 (79.5)       |
| Monthly unit size (patients)                    | 92 ± 51        | 65 ± 35            |
| Monthly unit size (patients)                    |                |                    |
| ≤25                                             | 28 (7.8)       | 154 (11.1)         |
| 26-50                                           | 53 (14.8)      | 388 (27.9)         |
| 51-100                                          | 127 (35.4)     | 651 (46.8)         |
| >100                                            | 151 (42.1)     | 198 (14.2)         |
| Age <50 years                                   | 19.4 ± 7.0     | 19.1 ± 7.8         |
| Black race                                      | 13.4 ± 13.8    | 40.9 ± 30.7        |
| Black race >50% of facility patients            | 7 (1.9)        | 531 (38.2)         |
| Hispanic ethnicity                              | 31.1 ± 22.2    | 9.2 ± 17.1         |
| Hispanic ethnicity >25% of facility patients    | 187 (52.1)     | 143 (10.2)         |
| Heart failure balance >25% of facility patients | 249 (69.4)     | 763 (54.9)         |
| Body mass index (kg/m <sup>2</sup> )            | 27.2 ± 1.4     | 28.2 ± 1.5         |
| Body mass Index (kg/m <sup>2</sup> )            |                |                    |
| <18.5                                           | 5.3 ± 3.3      | 4.7 ± 3.4          |
| 18.5-24.9                                       | 37.9 ± 7.5     | 33.5 ± 7.9         |
| 25.0-29.9                                       | 28.5 ± 5.8     | 27.8 ± 6.9         |
| ≥30                                             | 28.3 ± 8.2     | 34.0 ± 8.6         |

<sup>a</sup> CMS facility characteristics for January 2012.

**Supplemental Figure 1.** Monthly mean UF rates across 2012 under CMS and KCQA measure specifications.

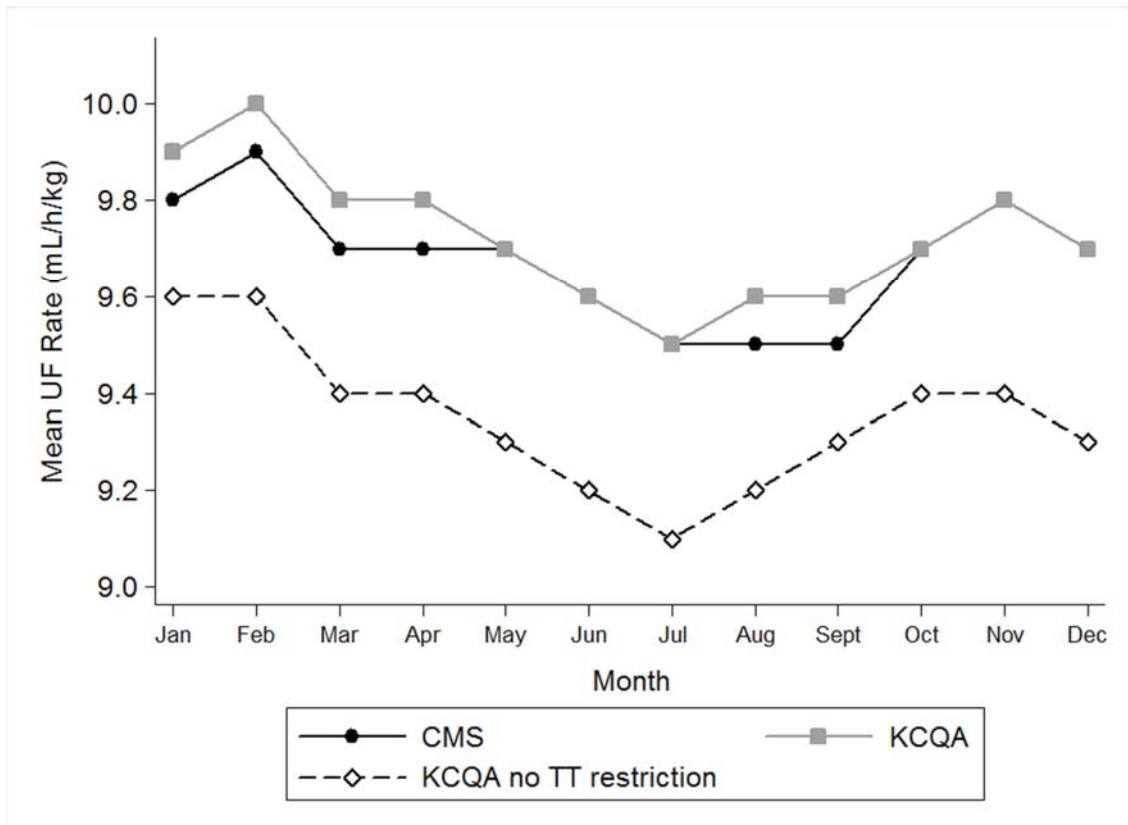

Abbreviations: CMS=Centers for Medicare & Medicaid Services, KCQA=Kidney Care Quality Alliance, UF=ultrafiltration, TT=treatment time.

**Supplemental Figure 2.** Weekly required additional facility treatment time with the application of a 13 mL/h/kg UF rate threshold without a total treatment time cap stratified by facility size.

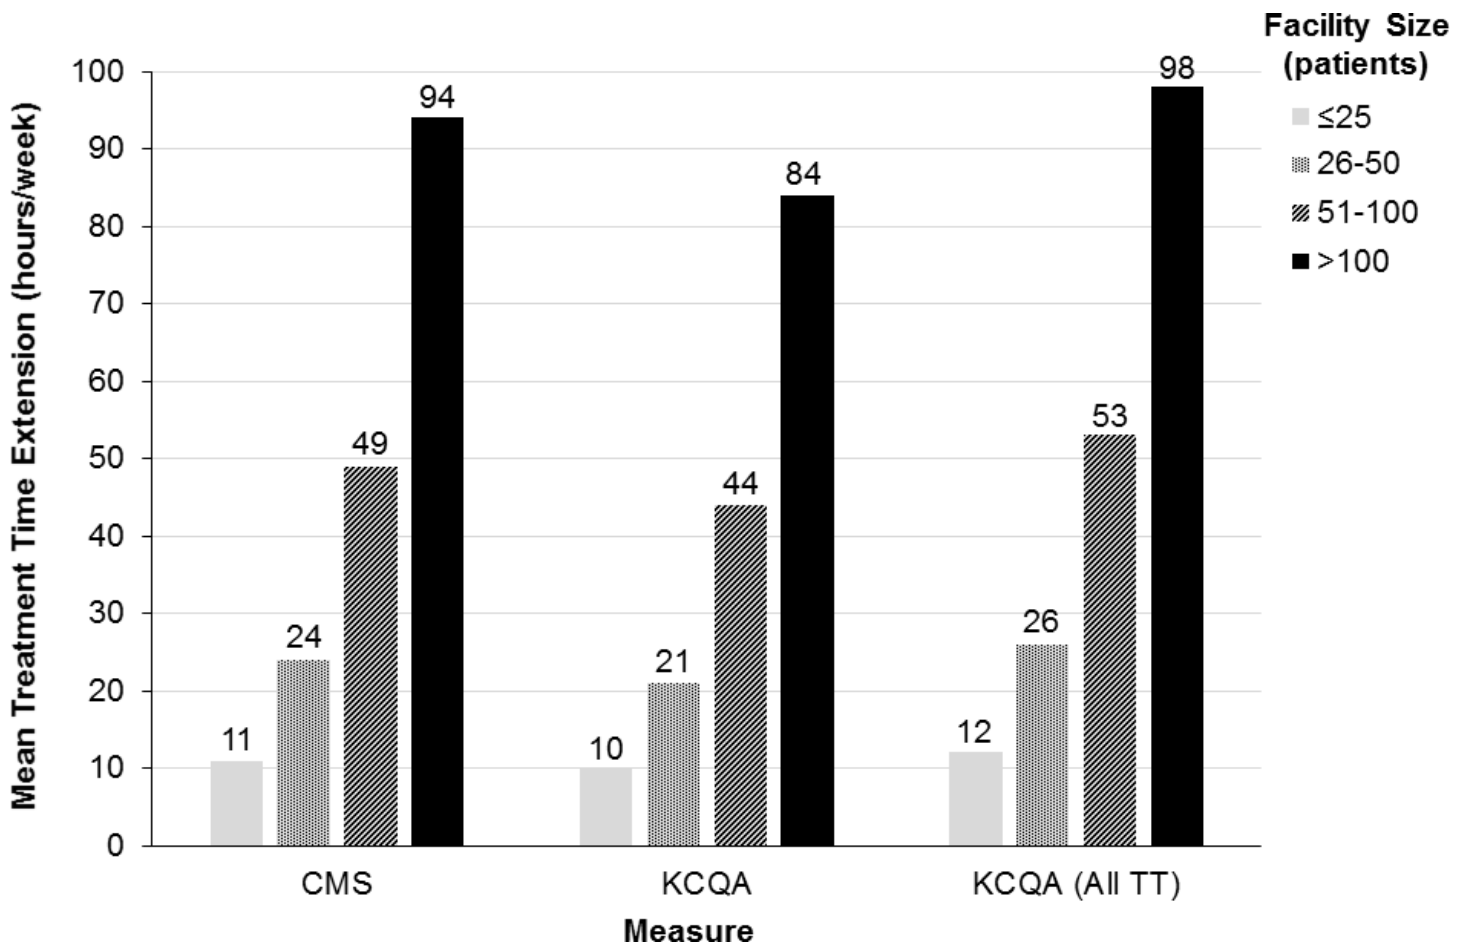

The additional TT required to lower prescribed UF rates <13 mL/h/kg was computed at the facility level and stratified by facility size. Total TT was capped at 4 hours per KCQA specifications. For these analyses, prescribed UF rate (mL/h/kg) was calculated using the formula: (pre-dialysis weight from current treatment – post-dialysis weight from previous treatment (mL))/ prescribed TT (h)/ post-dialysis weight from previous treatment (kg). For treatments with a prescribed UF rate <13 mL/h/kg, no additional TT was assigned. For treatments with a prescribed UF rate ≥13 mL/h/kg, the additional TT (in minutes) needed to achieve the UF rate <13 mL/h/kg was calculated as follows: ((pre-dialysis weight from current treatment – post-dialysis weight from previous treatment (mL))/ (post-dialysis weight from previous treatment (kg)\*12.9))\*60 – prescribed TT (min). Total TT was capped at 4 hours per treatment such that the UF rate remained ≥13 mL/h/kg for treatments in which UF rate reduction to rates <13 mL/h/kg would result in extension of TT beyond 4 hours. Additional patient TTs were then summed for the month at the patient and then facility levels. Detailed methods for estimation of TT extension are described in Supplemental Table 2

Abbreviations: TT=treatment time, UF=ultrafiltration, KCQA=Kidney Care Quality Alliance.
